# Supplementary material for: Cocatalyst designing: a binary noble-metal-free cocatalyst system consisting of ZnIn2S4 and In(OH)3 for efficient visible-light photocatalytic water splitting
Source: Royal Society of Chemistry journal article supplement (doi:10.1039/c7ra12586k), 2018-01-01
Supplement: c7ra12586k1.pdf [file c7ra12586k1.pdf]

**Cocatalyst Designing: A Binary Noble-metal-free Cocatalyst System Consisting of ZnIn<sub>2</sub>S<sub>4</sub> and In(OH)<sub>3</sub> for Efficient Visible-light Photocatalytic Water Splitting**

Jinyan Zhao <sup>a</sup>, Xiaoming Yan <sup>a</sup>, Ning Zhao <sup>b</sup>, Xiao Li <sup>a</sup>, Bin Lu <sup>a</sup>, Xuhong Zhang\*<sup>a</sup> and Haitao Yu\*<sup>a</sup>

*College of Chemistry and Materials Science, Hebei Normal University, Shijiazhuang*

*050024, China*

*\*To whom correspondence should be addressed.*

*The address for corresponding author*

*Xuhong Zhang:*

*College of Chemistry and Materials Science, Hebei Normal University, Shijiazhuang*

*050024, China*

*Email address: xuhongshd@126.com*

*Telephone: +86-311-8078-7400*

*Haitao Yu:*

*College of Chemistry and Materials Science, Hebei Normal University, Shijiazhuang*

*050024, China*

*Email address: haitaoyu@hebtu.edu.cn*

*Telephone: +86-311-8078-7400*

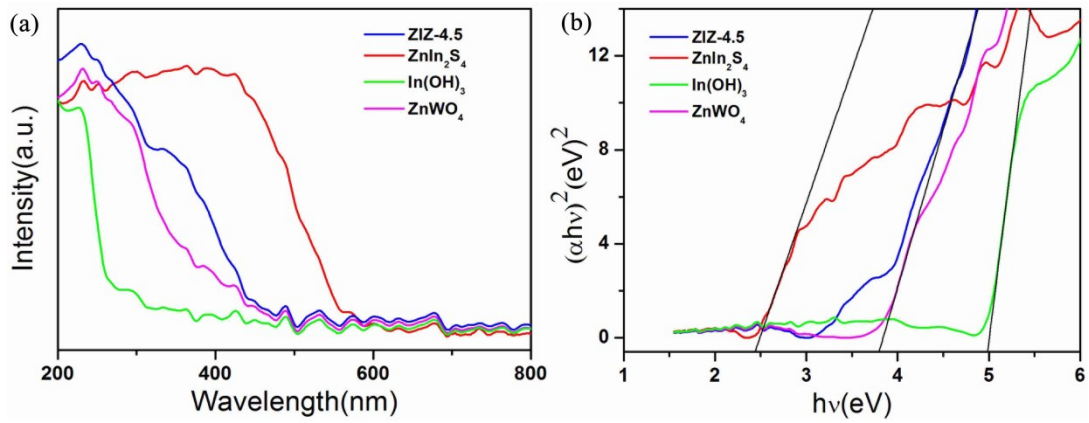

Fig. 1 (a) UV-vis diffuse reflectance spectra of ZIZ-4.5,  $\text{ZnIn}_2\text{S}_4$ ,  $\text{In(OH)}_3$  and  $\text{ZnWO}_4$ , (b) The band gap energy of  $\text{ZnIn}_2\text{S}_4$ ,  $\text{In(OH)}_3$  and  $\text{ZnWO}_4$ .

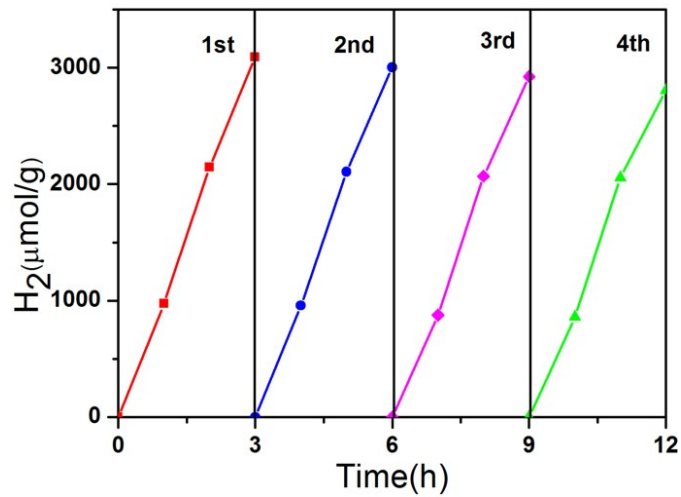

Fig. 2 Cyclic  $\text{H}_2$  production on ZIZ-4.5 photocatalyst. Reaction Conditions: photocatalyst 50 mg; light source, 300 W Xenon lamp equipped with a cut-off filter ( $\lambda > 420\text{nm}$ ); Reactant solution: 100 mL aqueous solution containing 0.25M  $\text{Na}_2\text{SO}_3$  and 0.35M  $\text{Na}_2\text{S}$ .

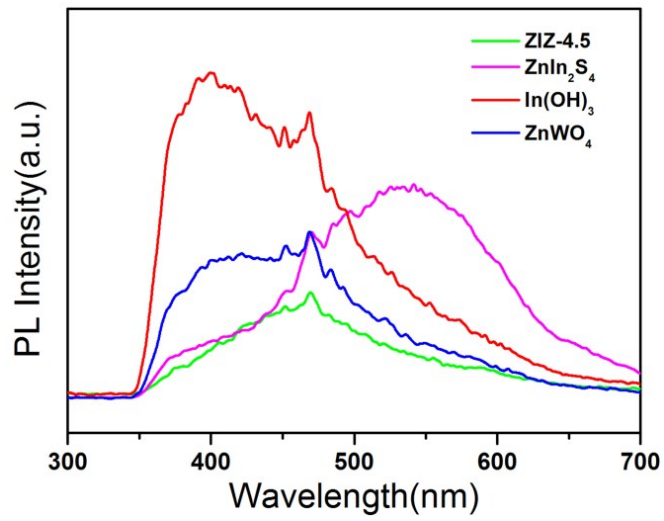

Fig. 3 Photoluminescence (PL) spectra of ZIZ-4.5,  $\text{ZnIn}_2\text{S}_4$ ,  $\text{In}(\text{OH})_3$  and  $\text{ZnWO}_4$  at room temperature ( $\lambda_{\text{ex}} = 215 \text{ nm}$ ).

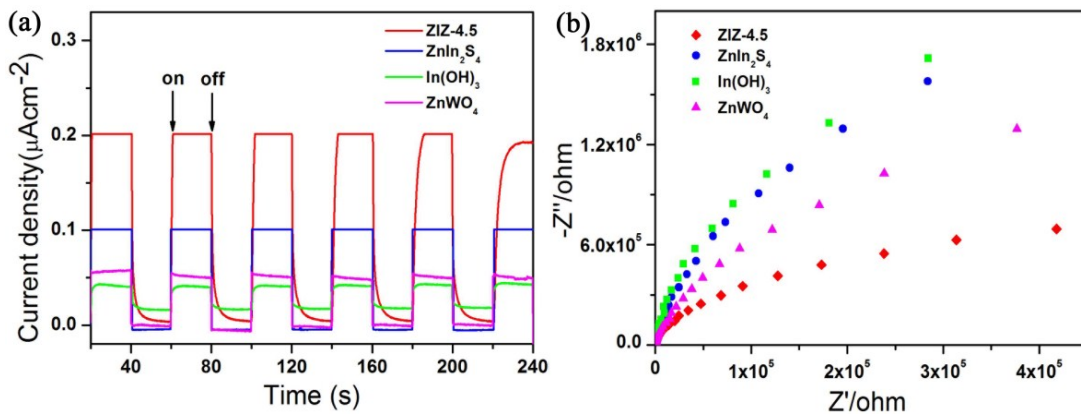

Fig. 4 (a) Transient photocurrent response and (b) the electrochemical impedance spectroscopy of ZIZ-4.5,  $\text{ZnIn}_2\text{S}_4$ ,  $\text{In}(\text{OH})_3$  and  $\text{ZnWO}_4$ .
